# Supplementary material for: Iberian pig adaptation to acorn consumption: I. Net portal appearance of metabolites
Source: PeerJ. 2018 Oct 31;6:e5861. doi: 10.7717/peerj.5861 (PMC6215437; doi:10.7717/peerj.5861)
Supplement: Data S1 [file peerj-06-5861-s001.xls]

## Sheet: Raw data biochemistry
Period (1=no adaptation; 2=1 wk adaptation)	hour of sampling	Pig name	Portal Plasma flow, ml/min	[Albumin] g/dl	[Albumin]artery g/dl	[Albumin]portal g/dl	Portal-Arterial albumin g/dl	NPA albumin, g/min	[glucose]artery, mg/dl	[glucose]portal	[Portal-Arterial] glucose mg/dl	NPA glucose, mg/min	[Lactate]artery, mM	[Lactate]portal, mM	[Portal-Arterial] lactate mmol/L	NPA lactate µmol/min	[NH3]artery, µmol/L	[NH3]portal, µmol/L	[Portal-Arterial] NH3 µmol/L	NPA NH3, µmol/min	[Triglycerides]artery, mM	[Triglycerides]portal, mM	[Portal-Arterial]triglycerides mM	NPA triglycerides, mmol/h	[Urea]artery, mg/dl	[Urea]portal, mg/dl	[Portal-Arterial]urea mg/dl	NPA urea, mg/min	[Cholesterol]artery, mM	[Cholesterol]portal, mM	[Portal-Arterial]cholesterol mM	NPACholesterol, µmol/min	[Crea]artery, mg/dl	[Crea]portal, mg/dl	[Portal-Arterial]crea mg/dl	NPA Crea, mg/min
1	0	Agapita1							69.8507		0.11375	0.439935	0.18		0.08	30.9406	215.2				0.073385		0.0034	0.0785968	0.6		1.6	6.18811					0.48			1.46968
1	0.5	Agapita1							64.8614		34.0783	324.292	0.79		-0.16	-152.257	8.6				0.232574		0.0644	3.67433	2.9		8.9	84.6932	1.981				0.6		0.03	0.285483
1	1	Agapita1							77.1684		25.3048	228.93	1.14				0.8				0.084675		-0.0124	-0.674122	12.3		-6	-54.2815					0.66
1	1.5	Agapita1							74.5074		39.9799	185.42	0.27		-0.08	-37.1027	11.5			186.951	0.12419		0.0881	2.4505	3.4		5.9	27.3632					0.65			-0.927567
1	2	Agapita1							80.4947		40.6153	193.825	0.25		-0.06	-28.6333	16		-8.4	-4.00866	0.053063		0.0147	0.420251	3.9		-0.3	-1.43167					0.73		0.01	0.0477222
1	2.5	Agapita1							79.8294		9.15059	42.7253	0.17		0.6	280.147	12.6		228.1	106.503	0.296927		0.0903	2.53029	12.7		-0.7	-3.26839	1.791				0.68		-0.06	-0.280147
1	3	Agapita1							82.12		27.9	151.241	1.36		0.16	86.7332	11.2				0.115158		0.1987	6.46284	17.9		-9.6	-52.0399					0.63		0.01	0.0542083
1	3.5	Agapita1		3.68	3.68		0.06	0.307073	87.42		18.51	94.7321	1.13		0.06	30.7073	256.9		112.7	57.6786	0.266444		0.166	5.09628	11		6.1	31.2191	2.366		0.085	43.502	0.61		0.06	0.307073
1	4	Agapita1		3.74	3.74		0.03	0.0880768	87.19		19.44	57.0738	0.84		0.02	5.87179	249.5		138	40.5153	0.359022		-0.0768	-1.35237	16.9		-3.2	-9.39486	2.422		-0.008	-2.34872	0.61		-0.03	-0.0880768
1	5	Agapita1		3.85	3.85		-0.22	-0.724948	80.86		12.53	41.2891	1.05		-0.02	-6.59044	267.4		151.6	49.9555	0.619821		-0.1355	-2.67862	16.2		3.3	10.8742	2.549		-0.042	-13.8399	0.61		0.07	0.230665
1	6	Agapita1		3.76	3.76		-0.12	-0.571959	82.44		6.01	28.6456	0.95		-0.04	-19.0653	354.5		43.4	20.6858	0.371441		-0.0531	-1.51749	14.1		-3.4	-16.2055	2.527		-0.074	-35.2708	0.62		0.03	0.14299
1	0	Agapita1	386.757							69.9645				0.26								0.076772				2.2				2.143				0.86
1	0.5	Agapita1	951.609							98.9397				0.63				426.4				0.296927				11.8								0.63
1	1	Agapita1	904.691			2.61				102.473				0.33				639				0.072256				6.3
1	1.5	Agapita1	463.783							114.487				0.19				414.6				0.212252				9.3				1.832				0.45
1	2	Agapita1	477.222	3.4		3.4				121.11				0.19								0.06774				3.6				2.152				0.74
1	2.5	Agapita1	466.912	3.84		3.84				88.98				0.77				240.7				0.387247				12				2.555				0.62
1	3	Agapita1	542.083	3.72		3.72				110.02				1.52				415.4				0.313862				8.3				2.391				0.64
1	3.5	Agapita1	511.789	3.74		3.74				105.93				1.19				369.6				0.432407				17.1				2.451				0.67
1	4	Agapita1	293.589	3.77		3.77				106.63				0.86				387.5				0.28225				13.7				2.414				0.58
1	5	Agapita1	329.522	3.63		3.63				93.39				1.03				419				0.484341				19.5				2.507				0.68
1	6	Agapita1	476.632	3.64		3.64				88.45				0.91				397.9				0.318378				10.7				2.453				0.65
1	0	Isabel1		3.15	3.15		-0.18	-0.739991	69.77		-4.96	-20.3909	1.45		-0.25	-102.777	256.4		140.9	0.4516	40		-0.0576	-1.42026	13.5		-3.8	-15.622	1.936		0.023	9.45544	0.56		0.11	0.452217
1	0.5	Isabel1		3.29	3.29		-0.15	-1.8218	88.01		9.07	110.158	1.74		0.03	36.436	251.7		128.5	0.459503	40.7		-0.1953	-14.2332	14.4		-1.4	-17.0035	2.018		-0.121		0.55		0.1	1.21453
1	1	Isabel1		3.19	3.19		0.01	0.0746441	83.98		24.31	181.46	1.56		0.02	14.9288	259		97.7	0.27096	24		0.1614	7.23064	15.5		-5.9	-44.04	1.929		0.036	26.8719	0.59		0.05	0.373221
1	1.5	Isabel1		3.11	3.11		-0.06	-0.349601	87.31		28.93	168.566	1.7		-0.07	-40.7868	267.5		148.2	0.324023	28.7		-0.035	-1.22357	8.8		-6.6	-38.4562	1.818		-0.006	-3.49601	0.6		0.04	0.233068
1	2	Isabel1		3.08	3.08				84.93		24.58	131.004	1.12		0.15	79.9456	249.9		114	0.305959	27.1		0.0147	0.469345	17		6.7	35.709	1.83		0.114	60.7587
1	2.5	Isabel1		3.47	3.47		-0.12	-0.502412	85.12		23.79	99.6032	1.72		0.17	71.175	251.7		163.7	0.42902	38		-0.0824	-2.07036	13.8		-0.2	-0.837353	1.986		0.005	2.09338	0.68		0.08	0.334941
1	3	Isabel1		3.17	3.17		-0.02	-0.0882736	81.89		10.39	45.8582	1.09		-0.05	-22.0684	249.4		247.7	0.272089	24.1		0.1084	2.87024	14.5		0.6	2.64821	1.79		-0.006	-2.64821
1	3.5	Isabel1		3.15	3.15		-0.18	-1.07873	76.1		5.17	30.9837	1.17		0.04	23.9719	233.9		204.7	0.283379	25.1		-0.0124	-0.44656	12.5		-8.9	-53.3374	1.755		0.053	31.7628	0.61		0.17	1.01881
1	4	Isabel1		3.26	3.26		-0.13	-0.667615	79.06		7.94	40.7759	1.26		-0.07	-35.9485	211.3		149.8	0.495631	43.9		0.1253	3.86146	7.2		6.3	32.3537	1.819		-0.015	-7.70325	0.65		0.04	0.20542
1	5	Isabel1		3.12	3.12		-0.06	-0.398473	88.29		10.45	69.4006	1.37		0.05	33.206	255.6		118.7	0.312733	27.7		0.0294	1.16968	10.5		7.3	48.4808	1.69		0.008	5.31297	0.64		0.04	0.265648
1	6	Isabel1		3.07	3.07		0.04	0.274404	80.66		8.28	56.8017	0.86		0.01	6.8601	258.7		116	0.355635	31.5		-0.0429	-1.76587	14.3		-3.1	-21.2663	1.719		0.006	4.11606	0.64		0.08	0.548808
1	0	Isabel1	411.106	2.97		2.97				64.81				1.2				397.3				0.394021				9.7				1.959				0.67
1	0.5	Isabel1	1214.53	3.14		3.14				97.08				1.77				380.2				0.264186				13				1.897				0.65
1	1	Isabel1	746.441	3.2		3.2				108.29				1.58				356.7				0.432407				9.6				1.965				0.64
1	1.5	Isabel1	582.669	3.05		3.05				116.24				1.63				415.7				0.289024				2.2				1.812				0.64
1	2	Isabel1	532.971	3.3		3.3				109.51				1.27				363.9				0.320636				23.7				1.944				0.63
1	2.5	Isabel1	418.677	3.35		3.35				108.91				1.89				415.4				0.346603				13.6				1.991				0.76
1	3	Isabel1	441.368	3.15		3.15				92.28				1.04				497.1				0.380473				15.1				1.784
1	3.5	Isabel1	599.297	2.97		2.97				81.27				1.21				438.6				0.27096				3.6				1.808				0.78
1	4	Isabel1	513.55	3.13		3.13				87				1.19				361.1				0.62095				13.5				1.804				0.69
1	5	Isabel1	664.121	3.06		3.06				98.74				1.42				374.3				0.342087				17.8				1.698				0.68
1	6	Isabel1	686.01	3.11		3.11				88.94				0.87				374.7				0.312733				11.2				1.725				0.72
1	0	Delfina1		3.7	3.7		-0.09	-0.516977	91.63		14.17	81.3951	1.1		0.13	74.6744	266.8		179.6	0.37257	33		0.0034	0.116733	16.4		-4.9	-28.1465	2.566		-0.039	-22.4023	0.57		0.14	0.804186
1	0.5	Delfina1		3.59	3.59		-0.09	-0.674352	82.38		51.51	385.954	2.03		0.38	284.726	336.5		125.8	0.512566	45.4		-0.061	-2.74084	9.9		3.1	23.2277	2.497		-0.086	-64.4381	0.57		0.05	0.37464
1	1	Delfina1		3.59	3.59		-0.07	-0.515639	90.11		50.9	374.943	1.79		0.4	294.651	301.1		158.8	0.60966	54		-0.0802	-3.54284	10.2		2.4	17.679	2.498		-0.08	-58.9302	0.6		0.03	0.220988
1	1.5	Delfina1		3.69	3.69		-0.1	-0.726917	93.11		43.8	318.39	1.45		0.22	159.922	337.4		98.2	0.619821	54.9		0.0531	2.31434	19.3		-3.7	-26.8959	2.488		-0.027	-19.6268	0.61		0.01	0.0726917
1	2	Delfina1		3.55	3.55		0.14	1.05171	84.53		31.34	235.434	1.24		0.21	157.757	267.7		91.7	0.563371	49.9		0.0011	0.0508879	14		1.1	8.26347	2.417		0.105	78.8785	0.61		0.11	0.826347
1	2.5	Delfina1		3.5	3.5		-0.03	-0.234174	85.7		36.06	281.478	1.31		0.19	148.31	263.9		139.2	0.394021	34.9		0.044	2.06219	9.2		2.6	20.2951	2.306		0.047	36.6873	0.56		-0.01	-0.0780581
1	3	Delfina1		3.6	3.6		-0.01	-0.0717873	93.26		26.51	190.308	0.96		0.19	136.396	256.5		112	0.488857	43.3		0.096	4.13344	8.5		7	50.2511	2.418		0.066	47.3796	0.57		0.12	0.861448
1	3.5	Delfina1		3.61	3.61		-0.16	-1.33506	88.25		20.87	174.142	1.12		0.2	166.882	283.4		111.7	0.706754	62.6		0.0452	2.26092	8.2		0.9	7.50971	2.433		-0.058	-48.3959	0.58		0.02	0.166882
1	4	Delfina1		3.54	3.54		0.03	0.336547	90.58		18.99	213.034	0.91		0.2	224.365	235		104.1	0.435794	38.6		-0.0418	-2.81171	18.5		-10.9		2.401		-0.001	-1.12182	0.58		0.04	0.448729
1	5	Delfina1		3.56	3.56		0.04	0.172206	84.19		17.8	76.6317	1.05		-0.02	-8.6103	278		70	0.657078	58.2		0.2032	5.24936	11.8		-3.3	-14.207	2.384		0.035	15.068	0.61		0	0
1	6	Delfina1		3.56	3.56		-0.04	-0.250993	80.06		14.47	90.7967	0.87		0.07	43.9238	239.6		105.8	0.681916	60.4		0.0158	0.595079	11.2		8.9	55.8459	2.392		-0.025	-15.6871	0.58		0.06	0.376489
1	0	Delfina1	574.419	3.61		3.61				105.8				1.23				446.4				0.375957				11.5				2.527				0.71
1	0.5	Delfina1	749.28	3.5		3.5				133.89				2.41				462.3				0.4516				13				2.411				0.62
1	1	Delfina1	736.627	3.52		3.52				141.01				2.19				459.9				0.529501				12.6				2.418				0.63
1	1.5	Delfina1	726.917	3.59		3.59				136.91				1.67				435.6				0.672884				15.6				2.461				0.62
1	2	Delfina1	751.224	3.69		3.69				115.87				1.45				359.4				0.5645				15.1				2.522				0.72
1	2.5	Delfina1	780.581	3.47		3.47				121.76				1.5				403.1				0.438052				11.8				2.353				0.55
1	3	Delfina1	717.873	3.59		3.59				119.77				1.15				368.5				0.584822				15.5				2.484				0.69
1	3.5	Delfina1	834.412	3.45		3.45				109.12				1.32				395.1				0.751914				9.1				2.375				0.6
1	4	Delfina1	1121.82	3.57		3.57				109.57				1.11				339.1				0.394021				7.6				2.4				0.62
1	5	Delfina1	430.515	3.6		3.6				101.99				1.03				348				0.860298				8.5				2.419				0.61
1	6	Delfina1	627.482	3.52		3.52				94.53				0.94				345.4				0.697722				20.1				2.367				0.64
1	0	Jerónima1*		3.83	3.83		0.05	0.23405	75.54		5.84	27.337	0.91		0.15	70.2149	313.2		233.5	0.185156	16.4		0.0655	1.83913	19.5		4.8	22.4688	1.983		0.031	14.5111	0.57		0.1	0.4681
1	0.5	Jerónima1		3.93	3.93		-0.04	-0.210411	72.33		48.38	254.492	1.85		0.3	157.808	355.2		199.2	0.257412	22.8		0.1648	5.20243	20.4		5.9	31.0356	2.041		0.039	20.5151	0.62		0.02	0.105206
1	1	Jerónima1		3.79	3.79		-0.07	-0.439383	82.95		46.07	289.177	1.35		0.32	200.861	338.1		217.9	0.258541	22.9		-0.0327	-1.23307	15.1		7.4	46.4491	1.865		0.074	46.4491	0.61		0.16	1.0043
1	1.5	Jerónima1		3.98	3.98		-0.09	-0.496904	85.87		44.68	246.685	1.24		0.32	176.677	297.1		194.7	0.434665	38.5		-0.2156	-7.14346	21.2		9.6	53.0031	1.97		0.03	16.5635	0.65		0.02	0.110423
1	2	Jerónima1		3.96	3.96		-0.2	-1.0983	92.52		27.69	152.059	1		0.19	104.338	306.2		134.7	0.539662	47.8		-0.2913	-9.59742	22.8		4.1	22.5151	2.024		-0.081	-44.481	0.61		0.17	0.933552
1	2.5	Jerónima1		3.88	3.88		-0.07	-0.475	90.88		23.6	160.143	0.95		0.16	108.571	266.9		154.4	0.235961	20.9		0.0452	1.83866	18.1		2.8	19	1.941		-0.002	-1.35714	0.64		0.08	0.542857
1	3	Jerónima1		5.05					116.55		-3.09	-16.3875	1.02		0.01	5.30339	346.8		57.6	0.249509	22.1		0.1095	3.48474	27.9		-4	-21.2136	2.553
1	3.5	Jerónima1		3.84	3.84		-0.08	-0.428615	82.63		20.38	109.19	0.75		0.1	53.5769	267.8		305.6	0.32741	29		0.4561	14.6624	22.5		-5.3	-28.3957	1.871		0.044	23.5738	0.72		-0.06	-0.321461
1	4	Jerónima1		3.95	3.95		-0.03	-0.161335	81.91		17.34	93.2515	0.77		0.2	107.557	302.5		127.3	0.569016	50.4		0.0418	1.34789	26.1		-3.3	-17.7468	2.011		-0.018	-9.68009	0.62		0.04	0.215113
1	5	Jerónima1		3.91	3.91		-0.05	-0.280401	82.24		11.75	65.8943	0.68		0.11	61.6883	256.8		224.3	0.386118	34.2		0.5284	17.7787	21.4		-2.9	-16.2633	1.889		0.045	25.2361	0.66		0.03	0.168241
1	6	Jerónima1		3.97	3.97				78.91		-0.66	-3.09916	0.64		0.09	42.2613	308.2		90	0.7903	70		-0.4448	-12.5326	26.8				1.964				0.65		0	0
1	0	Jerónima1	468.1	3.88		3.88				81.38				1.06				546.7				0.250638				24.3				2.014				0.67
1	0.5	Jerónima1	526.028	3.89		3.89				120.71				2.15				554.4				0.422246				26.3				2.08				0.64
1	1	Jerónima1	627.69	3.72		3.72				129.02				1.67				556				0.2258				22.5				1.939				0.77
1	1.5	Jerónima1	552.116	3.89		3.89				130.55				1.56				491.8				0.219026				30.8				2				0.67
1	2	Jerónima1	549.148	3.76		3.76				120.21				1.19				440.9				0.24838				26.9				1.943				0.78
1	2.5	Jerónima1	678.571	3.81		3.81				114.48				1.11				421.3				0.281121				20.9				1.939				0.72
1	3	Jerónima1	530.339	3.91		3.91				113.46				1.03				404.4				0.359022				23.9				1.939				0.64
1	3.5	Jerónima1	535.769	3.76		3.76				103.01				0.85				573.4				0.783526				17.2				1.915				0.66
1	4	Jerónima1	537.783	3.92		3.92				99.25				0.97				429.8				0.610789				22.8				1.993				0.66
1	5	Jerónima1	560.803	3.86		3.86				93.99				0.79				481.1				0.91449				18.5				1.934				0.69
1	6	Jerónima1	469.57	3.38		3.38				78.25				0.73				398.2				0.345474				10.5				1.692				0.65
2	0	Delfina2		3.64	3.64		-0.07	-0.401868	76.92		11.91	68.3749	0.88		0.16	91.8555	455.3		31.1	0.488857	43.3		0.1366	4.70561	1.9		5.1	29.2789	2.685		0.001	0.574097	0.73		0	0
2	0.5	Delfina2		3.5	3.5		0.05	0.481059	70		33.09	318.365	1.53		0.53	509.923	452.4		63.5	0.414343	36.7		0.1242	7.16913	2.3		-1.4	-13.4697	2.602		0.073	70.2347	0.72		0.14	1.34697
2	1	Delfina2		3.59	3.59		0	0	78.87		29.21	293.282	1.47		0.33	331.335	438		39.9	0.48547	43		-0.1084	-6.52936	3		-0.3	-3.01214	2.58		0.092	92.3723	0.75		0.15	1.50607
2	1.5	Delfina2		3.51	3.51		-0.06	-0.444078	75.9		26.04	192.73	1.01		0.25	185.032	422.3		27.8	0.476438	42.2		-0.0147	-0.651773	1.8		0.3	2.22039	2.575		0.001	0.740129	0.74		0.06	0.444078
2	2	Delfina2		3.43	3.43		-0.07	-0.505852	84.87		24.93	180.156	1.04		0.24	173.435	433.3		41.3	0.339829	30.1		0.1118	4.84625	3.8		0.9	6.50382	2.442		0.001	0.722646	0.75		0.01	0.0722646
2	2.5	Delfina2		3.47	3.47		-0.03	-0.27896	84.75		23.31	216.752	1.11		0.21	195.272	394.4		54.9	0.387247	34.3		-0.0215	-1.19679	4.8		-1.4	-13.0181	2.436		-0.013	-12.0883	0.75		0.01	0.0929867
2	3	Delfina2		3.45	3.45		-0.01	-0.0806398	88.29		20.99	169.263	1.24		0.39	314.495	359.2		82.2	0.679658	60.2		-0.2642	-12.7823	0		4.8	38.7071	2.468		-0.069	-55.6414	0.75		0.03	0.241919
2	3.5	Delfina2		3.46	3.46		-0.09	-0.679118	86.22		23.74	179.136	0.83		0.25	188.644	394.6		62.5	0.324023	28.7		-0.0463	-2.09571	3.4		-0.6	-4.52745	2.38		-0.032	-24.1464	0.86		-0.03	-0.226373
2	4	Delfina2		3.53	3.53		-0.11	-0.798446	89.7		11.82	85.7966	0.96		0.23	166.948	494.4		7.2	0.369183	32.7		0.0361	1.57343	4.9		-1.1	-7.98446	2.464		-0.104	-75.4894	0.9		0.01	0.072586
2	5	Delfina2		3.36	3.36		-0.07	-0.495682	95.63		9.59	67.9084	1.31		0.12	84.974	436.5		37.8	0.31612	28		0.026	1.10326	0		1.3	9.20552	2.204		0.005	3.54058	0.77		0.14	0.991364
2	6	Delfina2		3.26	3.26				88.08		21.45	191.02	1.02		0.34	302.782	529.6		66.6	0.555468	49.2		-0.044	-2.35267	7		-7	-62.3375	2.125		0.141	125.566	0.79		0.04	0.356214
2	0	Delfina2	574.097	3.57		3.57				88.83				1.04				486.4				0.625466				7				2.686				0.73
2	0.5	Delfina2	962.119	3.55		3.55				103.09				2.06				515.9				0.538533				0.9				2.675				0.86
2	1	Delfina2	1004.05	3.59		3.59				108.08				1.8				477.9				0.377086				2.7				2.672				0.9
2	1.5	Delfina2	740.129	3.45		3.45				101.94				1.26				450.1				0.461761				2.1				2.576				0.8
2	2	Delfina2	722.646	3.36		3.36				109.8				1.28				474.6				0.4516				4.7				2.443				0.76
2	2.5	Delfina2	929.867	3.44		3.44				108.06				1.32				449.3				0.365796				3.4				2.423				0.76
2	3	Delfina2	806.398	3.44		3.44				109.28				1.63				441.4				0.415472				4.8				2.399				0.78
2	3.5	Delfina2	754.575	3.37		3.37				109.96				1.08				457.1				0.277734				2.8				2.348				0.83
2	4	Delfina2	725.86	3.42		3.42				101.52				1.19				501.6				0.405311				3.8				2.36				0.91
2	5	Delfina2	708.117	3.29		3.29				105.22				1.43				474.3				0.342087				1.3				2.209				0.91
2	6	Delfina2	890.536	3.58		3.58				109.53				1.36				596.2				0.511437				0				2.266				0.83
2	0	Jerónima2		3.6	3.6		-0.15	-0.983262	81.73		5.94	38.9372	0.79		0.12	78.661	406.9		3.8	0.887394	78.6		-0.2484	-9.76891	0		1.3	8.52161	2.732		-0.064	-41.9525	0.65		0.05	0.327754
2	0.5	Jerónima2		3.42	3.42		0.06	0.560473	88.79		32.46	303.216	1.45		0.39	364.307	463.7		71.6	0.254025	22.5		0.2213	12.4024	5		0.1	0.934121	2.538		0.065	60.7179	0.62		0.12	1.12095
2	1	Jerónima2		3.42	3.42		-0.05	-0.413266	86.76		29.06	240.19	0.94		0.27	223.164	463		29.6	0.307088	27.2		0.2134	10.582	2.5		2.5	20.6633	2.459		0.132	109.102	0.64		0.08	0.661225
2	1.5	Jerónima2		3.46	3.46		-0.15	-1.04981	85.31		26.16	183.087	0.82		0.24	167.97	447.7		68.4	0.897555	79.5		0.1716	7.20624	0		5.7	39.8928	2.562		-0.039	-27.2951	0.67		0.07	0.489912
2	2	Jerónima2		3.42	3.42		-0.03	-0.200082	87.14		20.24	134.988	0.76		0.16	106.71	457.2		65.4	0.260799	23.1		0.1637	6.55087	6.5		1.8	12.0049	2.512		0.102	68.0277	0.65		0.14	0.933714
2	2.5	Jerónima2		3.47	3.47		-0.09	-0.655443	85.64		21.69	157.962	0.8		0.17	123.806	424.4		53.4	0.441439	39.1		-0.1897	-8.28794	5		2.1	15.2937	2.503		-0.036	-26.2177	0.7		-0.03	-0.218481
2	3	Jerónima2		3.42	3.42		0.06	0.599063	85.47		18.64	186.109	0.78		0.26	259.594	379.7		22.2	0.298056	26.4		0.0689	4.12569	3.1		-3.1	-30.9516	2.44		0.118	117.816	0.67		0.09	0.898595
2	3.5	Jerónima2		3.42	3.42		0.01	0.0761132	82.71		19.05	144.996	0.82		0.21	159.838	415		25	0.539662	47.8		-0.2868	-13.096	1.5		4.6	35.0121	2.472		0.018	13.7004	0.69		0.09	0.685019
2	4	Jerónima2		3.4	3.4		-0.05	-0.551224	82.05		12.49	137.696	0.67		0.18	198.441	415.1		52	0.330797	29.3		0.0124	0.821478	2.1		-2.1	-23.1514	2.445		0.007	7.71714	0.68		0.07	0.771714
2	5	Jerónima2		3.42	3.42		-0.14	-1.19099	84.47		13.3	113.144	0.78		0.13	110.591	405.7		12.5	0.320636	28.4		0.2123	10.8338	0.4		-0.4	-3.40281	2.372		0.03	25.5211	0.68		0.04	0.340281
2	6	Jerónima2		3.4	3.4		0.05	0.313161	82.81		9.4	58.8743	0.74		0.12	75.1587	435.7		-8.7	0.34999	31		0.0903	3.39416	0		5.2	32.5688	2.49		0.007	4.38425	0.72		0.02	0.125264
2	0	Jerónima2	655.508	3.45		3.45				87.67				0.91				410.7				0.639014				1.3				2.668				0.7
2	0.5	Jerónima2	934.121	3.48		3.48				121.25				1.84				535.3				0.475309				5.1				2.603				0.74
2	1	Jerónima2	826.532	3.37		3.37				115.82				1.21				492.6				0.520469				5				2.591				0.72
2	1.5	Jerónima2	699.875	3.31		3.31				111.47				1.06				516.1				1.06916				5.7				2.523				0.74
2	2	Jerónima2	666.938	3.39		3.39				107.38				0.92				522.6				0.424504				8.3				2.614				0.79
2	2.5	Jerónima2	728.27	3.38		3.38				107.33				0.97				477.8				0.251767				7.1				2.467				0.67
2	3	Jerónima2	998.439	3.48		3.48				104.11				1.04				401.9				0.366925				0				2.558				0.76
2	3.5	Jerónima2	761.132	3.43		3.43				101.76				1.03				440				0.252896				6.1				2.49				0.78
2	4	Jerónima2	1102.45	3.35		3.35				94.54				0.85				467.1				0.343216				0				2.452				0.75
2	5	Jerónima2	850.704	3.28		3.28				97.77				0.91				418.2				0.532888				0				2.402				0.72
2	6	Jerónima2	626.322	3.45		3.45				92.21				0.86				427				0.44031				5.2				2.497				0.74
2	0	Bárula2		3.52	3.52		-0.04	-0.294174	89.19		11.09	81.5598	0.92		0.56	411.844	232.5		54.3	0.326281	28.9		0.0756	3.33783	5.9		-5	-36.7718	2.506		-0.057	-41.9198
2	0.5	Bárula2		3.52	3.52		0.03	0.241198	100.11		35.67	286.784	1.69		0.35	281.397	295.9		58.7	0.399666	35.4		-0.0723	-3.48559	1		0.7	5.62794	2.449		-0.025	-20.0998	0.81		0	0
2	1	Bárula2		3.44	3.44		-0.23	-2.02904	101.86		18.76	165.499	1.52		0.24	211.726	295.4		75.6	0.265315	23.5		0.0169	0.896393	2.6		0.1	0.88219	2.338		-0.096	-84.6902	0.75		0.09	0.793971
2	1.5	Bárula2		3.51	3.51		0	0	113.17		30.46	275.553	1.09		0.41	370.902	293.6		33.3	0.296927	26.3		0.0745	4.04449	2.7		-0.5	-4.52319	2.413		0.032	28.9484	0.8		0.09	0.814175
2	2	Bárula2		3.45	3.45		-0.01	-0.0880265	97.78		27.6	242.953	1.18		0.36	316.895	291.2		31.3	0.242735	21.5		0.0677	3.57775	1.6		0.8	7.04212	2.375		0.019	16.725
2	2.5	Bárula2		3.5	3.5		-0.11	-0.68314	91.6		17.46	108.433	0.99		0.18	111.786	241		59.4	0.405311	35.9		-0.0271	-1.00966	2.3		0.3	1.86311	2.345		-0.035	-21.7363	0.82		-0.05	-0.310518
2	3	Bárula2		3.55	3.55		-0.01	-0.0818547	93.35		16.65	136.288	1.01		0.27	221.008	287.8		34.8	0.256283	22.7		0.0169	0.831726	2		-0.5	-4.09274	2.396		-0.01	-8.18547	0.79		0.06	0.491128
2	3.5	Bárula2		3.48	3.48		-0.02	-0.165722	92.57		13.32	110.371	0.95		0.17	140.864	269.2		27.1	0.292411	25.9		-0.0271	-1.34712	0.4		1	8.28609	2.325		-0.004	-3.31444
2	4	Bárula2		3.54	3.54		-0.03	-0.251601	92.36		14.21	119.175	1.08		0.25	209.668	268		41.3	0.319507	28.3		0.0711	3.57913	2		0.7	5.8707	2.335		-0.004	-3.35469	0.78		0.07	0.58707
2	5	Bárula2		3.52	3.52		-0.06	-0.447328	88.1		9.64	71.8707	1.03		0.23	171.476	264.8		47.6	0.448213	39.7		0.0711	3.18171	2.2		0.6	4.47328	2.345		0.004	2.98219	0.82		0.03	0.223664
2	6	Bárula2		3.58	3.58		-0.14	-0.998402	88.92		3.55	25.3166	0.76		0.22	156.892	259.1		112	0.461761	40.9		-0.044	-1.88403	0.9		0.8	5.70515	2.33		-0.051	-36.3704	0.83		0.05	0.356572
2	0	Bárula2	735.435	3.48		3.48				100.28				1.48				286.8				0.401924				0.9				2.449				0.86
2	0.5	Bárula2	803.992	3.55		3.55				135.78				2.04				354.6				0.32741				1.7				2.424				0.81
2	1	Bárula2	882.19	3.21		3.21				120.62				1.76				371				0.28225				2.7				2.242				0.84
2	1.5	Bárula2	904.639	3.51		3.51				143.63				1.5				326.9				0.371441				2.2				2.445				0.89
2	2	Bárula2	880.265	3.44		3.44				125.38				1.54				322.5				0.310475				2.4				2.394				0.88
2	2.5	Bárula2	621.036	3.39		3.39				109.06				1.17				300.4				0.378215				2.6				2.31				0.77
2	3	Bárula2	818.547	3.54		3.54				110				1.28				322.6				0.273218				1.5				2.386				0.85
2	3.5	Bárula2	828.609	3.46		3.46				105.89				1.12				296.3				0.265315				1.4				2.321				0.8
2	4	Bárula2	838.672	3.51		3.51				106.57				1.33				309.3				0.390634				2.7				2.331				0.85
2	5	Bárula2	745.546	3.46		3.46				97.74				1.26				312.4				0.51934				2.8				2.349				0.85
2	6	Bárula2	713.144	3.44		3.44				92.47				0.98				371.1				0.41773				1.7				2.279				0.88
2	0	Agapita2		2.97	2.97		-0.02	-0.172968	83.66		6.64	57.4253	0.88		0.21	181.616	258.3		102.6	0.268702	23.8		0.0395	2.05045	4.7		-1.3	-11.2429	1.945		0.033	28.5397	0.57		0.03	0.259452
2	0.5	Agapita2		2.95	2.95		0.02	0.184897	80.71		24.2	223.726	1.88		0.51	471.488	334.7		92	0.268702	23.8		-0.0124	-0.688872	5.1		-0.9	-8.32038	1.989		-0.007	-6.47141	0.58		0.03	0.277346
2	1	Agapita2		2.95	2.95		-0.13	-1.35802	85.65		22.09	230.758	1.41		0.44	459.636	284.7		111.8	0.231445	20.5		0.0802	5.02418	4.5		1	10.4463	1.959		0.001	1.04463	0.58		0.04	0.417851
2	1.5	Agapita2		2.97	2.97		-0.1	-1.21686	90.52		25.21	306.77	1.1		0.41	498.912	318.7		56.8	0.404182	35.8		0.1287	9.39701	4.9		-0.3	-3.65057	1.986		0.098	119.252	0.62		0.09	1.09517
2	2	Agapita2		2.83	2.83		0.11	1.04273	84.8		23.45	222.292	0.99		0.39	369.697	268.4		85.8	0.267573	23.7		0.0723	4.10966	4.3		0.7	6.63558	1.928		0.142	134.608	0.6		0.01	0.094794
2	2.5	Agapita2		2.88	2.88		-0.1	-0.856173	91.2		16.9	144.693	0.94		0.28	239.728	255.4		92	0.273218	24.2		-0.0508	-2.60987	4.4		0.4	3.42469	1.959		-0.044	-37.6716	0.59		0.03	0.256852
2	3	Agapita2		2.95	2.95				92.95		16.72	145.901	1.05		0.19	165.797	264.3		68.8	0.366925	32.5		-0.026	-1.35955	4.6		1	8.72614	2.011		0.057	49.739	0.61		0.12	1.04714
2	3.5	Agapita2		2.9	2.9		-0.09	-0.805083	88.71		13.11	117.274	0.93		0.38	339.924	270		80.6	0.260799	23.1		0.0474	2.54503	4.6		0.3	2.68361	1.972		0.035	31.3088	0.6		0.07	0.626175
2	4	Agapita2		2.9	2.9		-0.06	-0.562374	88.21		12.84	120.348	0.97		0.37	346.797	282.8		84.4	0.263057	23.3		0.0215	1.20635	5.3		-0.8	-7.49832	2.015		-0.009	-8.43561	0.58		0.03	0.281187
2	5	Agapita2		2.72	2.72		0.15	1.52543	102.39		-8.36	-85.0175	1.23		-0.23	-233.9	323.9		-90.4	0.240477	21.3		-0.0327	-1.99777	4.5		-0.6	-6.10173	2.023		-0.032	-32.5426	0.7		-0.11
2	6	Agapita2		2.87	2.87		0.05	0.499498	88.03		8.4	83.9157	1.01		0.37	369.629	250.4		78.2	0.277734	24.6		0.0689	4.12799	3.8		0.4	3.99599	2.042		0.048	47.9518	0.59		0.05	0.499498
2	0	Agapita2	864.839	2.95		2.95				90.3				1.09				360.9				0.308217				3.4				1.978				0.6
2	0.5	Agapita2	924.487	2.97		2.97				104.91				2.39				426.7				0.256283				4.2				1.982				0.61
2	1	Agapita2	1044.63	2.82		2.82				107.74				1.85				396.5				0.311604				5.5				1.96				0.62
2	1.5	Agapita2	1216.86	2.87		2.87				115.73				1.51				375.5				0.532888				4.6				2.084				0.71
2	2	Agapita2	947.94	2.94		2.94				108.25				1.38				354.2				0.339829				5				2.07				0.61
2	2.5	Agapita2	856.173	2.78		2.78				108.1				1.22				347.4				0.222413				4.8				1.915				0.62
2	3	Agapita2	872.614	4.89						109.67				1.24				333.1				0.340958				5.6				2.068				0.73
2	3.5	Agapita2	894.536	2.81		2.81				101.82				1.31				350.6				0.308217				4.9				2.007				0.67
2	4	Agapita2	937.289	2.84		2.84				101.05				1.34				367.2				0.284508				4.5				2.006				0.61
2	5	Agapita2	1016.96	2.87		2.87				94.03				1				233.5				0.207736				3.9				1.991				0.59
2	6	Agapita2	998.997	2.92		2.92				96.43				1.38				328.6				0.346603				4.2				2.09				0.64
